# Supplementary material for: Sensitizing chemotherapy for glioma with fisetin mediated by a microenvironment-responsive nano-drug delivery system
Source: Royal Society of Chemistry journal article supplement (doi:10.1039/d3nr05195a), 2023-11-22
Supplement: d3nr05195a1.pdf [file d3nr05195a1.pdf]

## **Sensitizing Chemotherapy for Glioma with Fisetin mediated by Microenvironment-responsive nano-drug delivery system**

Wanyu Wang<sup>1,#</sup>, Yuanyuan Zhang<sup>2,#</sup>, Yue Jian<sup>1,#</sup>, Shi He<sup>1</sup>, Jiagang Liu<sup>1</sup>, Yongzhong Cheng<sup>1</sup>, Songping Zheng<sup>1</sup>, Zhiyong Qian<sup>1</sup>, Xiang Gao<sup>1</sup>, Xiang Wang<sup>1\*</sup>.

<sup>1</sup> Department of Neurosurgery, State Key Laboratory of Biotherapy and Cancer Center, West China Hospital, Sichuan University, Chengdu 610041, PR China

<sup>2</sup>Key Laboratory of Drug Targeting and Drug Delivery Systems, Ministry of Education, West China School of Pharmacy, Sichuan University, Chengdu 610041, China

#These authors contributed equally to this work.

\*Correspondence author: Xiang Wang

E-mail: wangxiangtim@163.com

**Fig. S1. Synthesis route of PEG-SS-PLA**

**Fig. S2. Synthesis route of cRGD-PEG-PLA.**

**Fig.S3. Structural identification of PEG-SS-PLA(a) and cRGD-PEG-PLA(b).**

**Fig.S4. Zeta potential of Fis-DOX/cRGD-NPs**

**Fig. S5. Cell viability study of the nanocomposites by CCK8 assay in U87 cells.**  
Synergistic effects of DOX and Fisetin in the carrier system on cytotoxicity in U87 cells. CCK-8 assay was used to assess the cytotoxicity of blank NPs, DOX/NPs, and Fis-DOX/NPs from 0  $\mu\text{g/ml}$  to 0.5  $\mu\text{g/ml}$  at 24 h (a) and 48 h (b). N=3.

**Fig. S6. Analysis of cell cycle in U87-MG cells.** Synergistic effects of DOX and Fisetin in the carrier system cell cycle arrest in U87 cells. (a) Flow cytometric analysis. U87 cells were treated with blank NPs, DOX/NPs, and Fis-DOX/NPs at 0.125  $\mu\text{g}/\text{ml}$  for 24 h. (b) Populations of cells at G0/G1, S, and G2/M phases were displayed as percentages of the whole cell population.

**Fig. S7. Apoptosis assay of U87-MG cells.** Synergistic effects of DOX and Fisetin in the NPs carrier system on tumor cell apoptosis. U87 cells were treated with blank NPs, DOX/NPs and Fis-DOX/NPs at concentrations of 0  $\mu\text{g/ml}$  and 0.0625  $\mu\text{g/ml}$  for 24 h. (a)(b) Cells were collected and stained with Annexin V and PI for flow cytometric analysis.



**Fig. S8.** Western blot analysis of U87-MG Cell.

**Fig. S9.** Flow cytometry analysis of the uptake of Dox in (a) GL-261 cells and (b) U87-MG after different treatments.

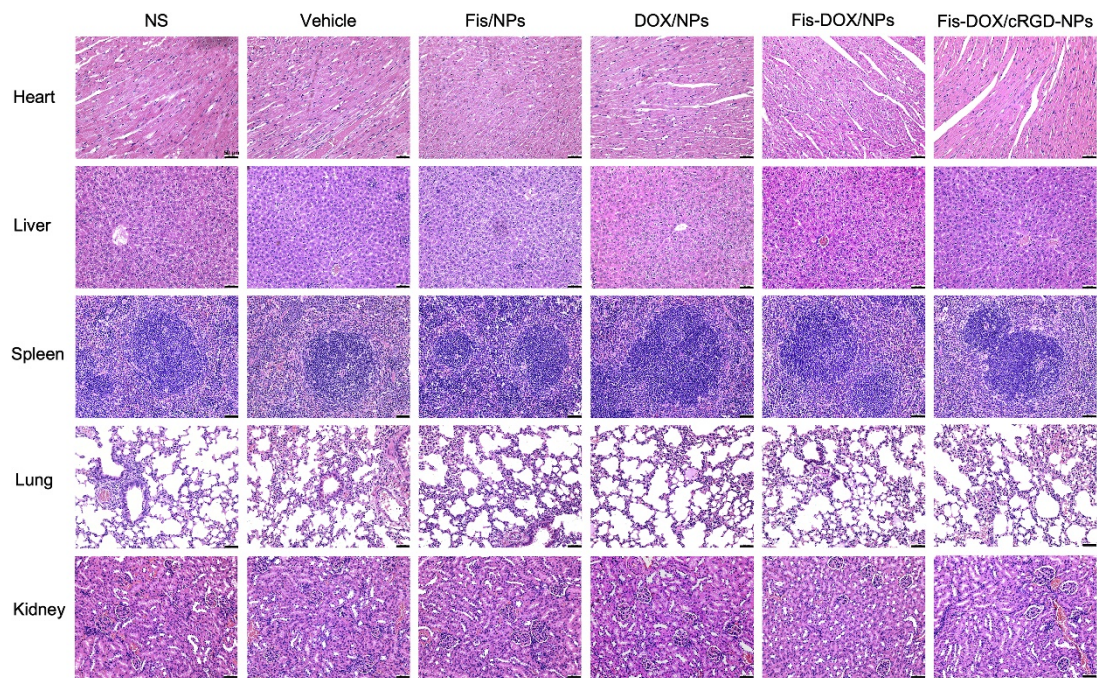

**Fig. S10.** Toxicity assessment in H&E staining with pathological section.

**Fig. S11.** Toxicity assessment in serologic biochemical analysis.

**Fig. S12.**The raw image of Western blot of GL261 cells.

**Fig. S13. The raw image of Western blot of U87 cells.**
